# Supplementary material for: Comprehensive characterization of toxicity of fermentative metabolites on microbial growth
Source: PubMed Central journal article supplement (PMC5707818; doi:10.1186/s13068-017-0952-4), 2017-11-30

## **Additional File 1**

# **Comprehensive Characterization of Toxicity of Fermentative Metabolites on Microbial Growth**

Brandon Wilbanks<sup>1</sup> and Cong T. Trinh<sup>1,2,\*</sup>

<sup>1</sup>Department of Chemical and Biomolecular Engineering, University of Tennessee, Knoxville, TN  
37920

<sup>2</sup>Bioenergy Science Center (BESC), Oak Ridge National Laboratory, Oak Ridge

\*Corresponding author:

Cong T. Trinh

Dept of Chemical and Biomolecular Engineering

University of Tennessee, Knoxville

1512 Middle Dr., DO#432

Knoxville, TN 37996

[ctrinh@utk.edu](mailto:ctrinh@utk.edu)

Additional Contact Information:

Brandon Wilbanks: [brandonawilbanks@gmail.com](mailto:brandonawilbanks@gmail.com)

**Figure S1:** Growth kinetics of *E. coli* exposed to eight short-chain alcohols at various concentrations including (A) ethanol, (B) propanol, (C) isopropanol, (D) butanol, (E) isobutanol, (F) pentanol, (G) isopentanol, and (H) hexanol

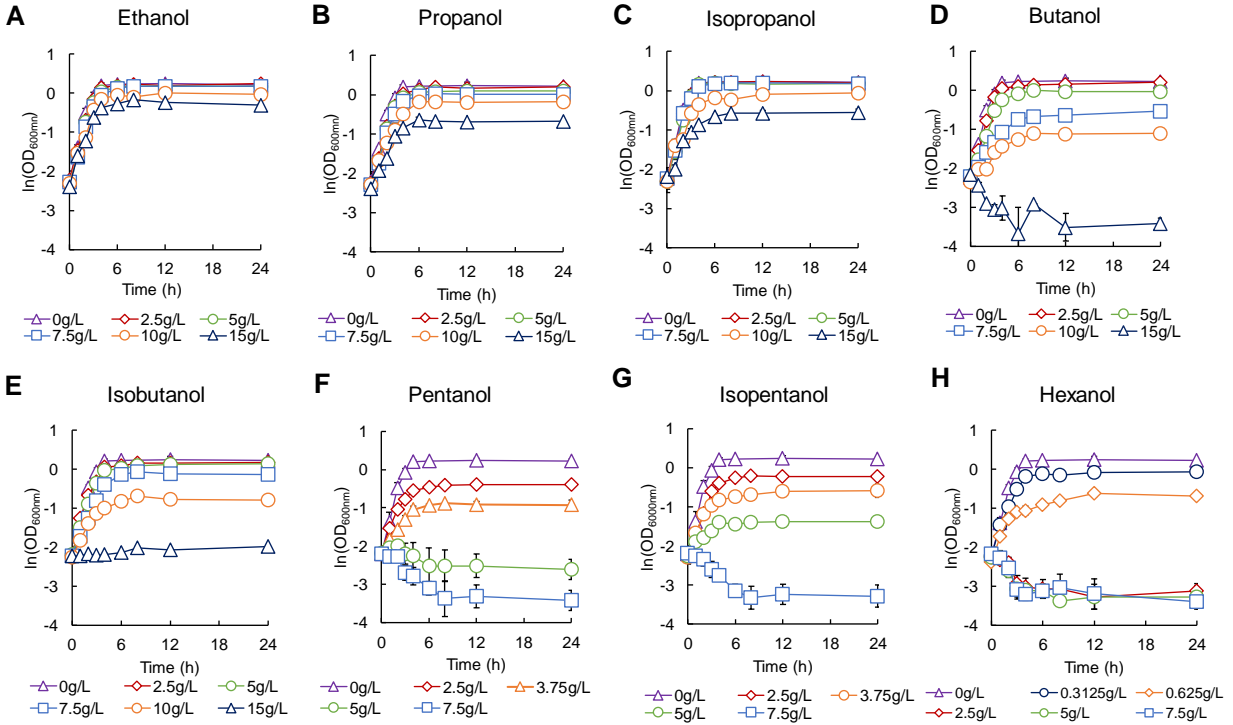

**Figure S2:** Growth kinetics of *E. coli* exposed to eight short-chain fatty acids at various concentrations including (A) acetic acid, (B) propanoic acid, (C) butanoic acid, (D) isobutanoic acid, (E) pentanoic acid, (F) isopentanoic acid, (G) hexanoic acid, and (H) octanoic acid

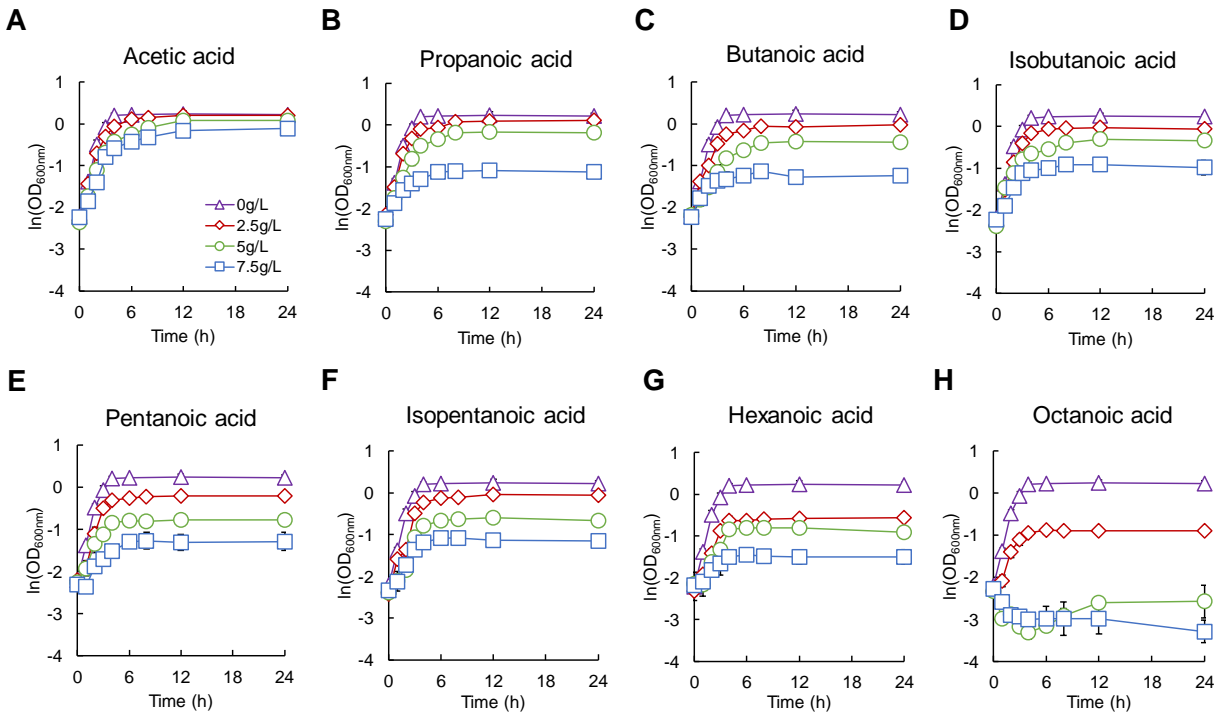

**Figure S3:** Growth kinetics of *E. coli* exposed to sixteen short-chain esters at various concentrations including (A-D) ethyl esters, (E-J) (iso)propyl esters, and (K-P) (iso)butyl esters

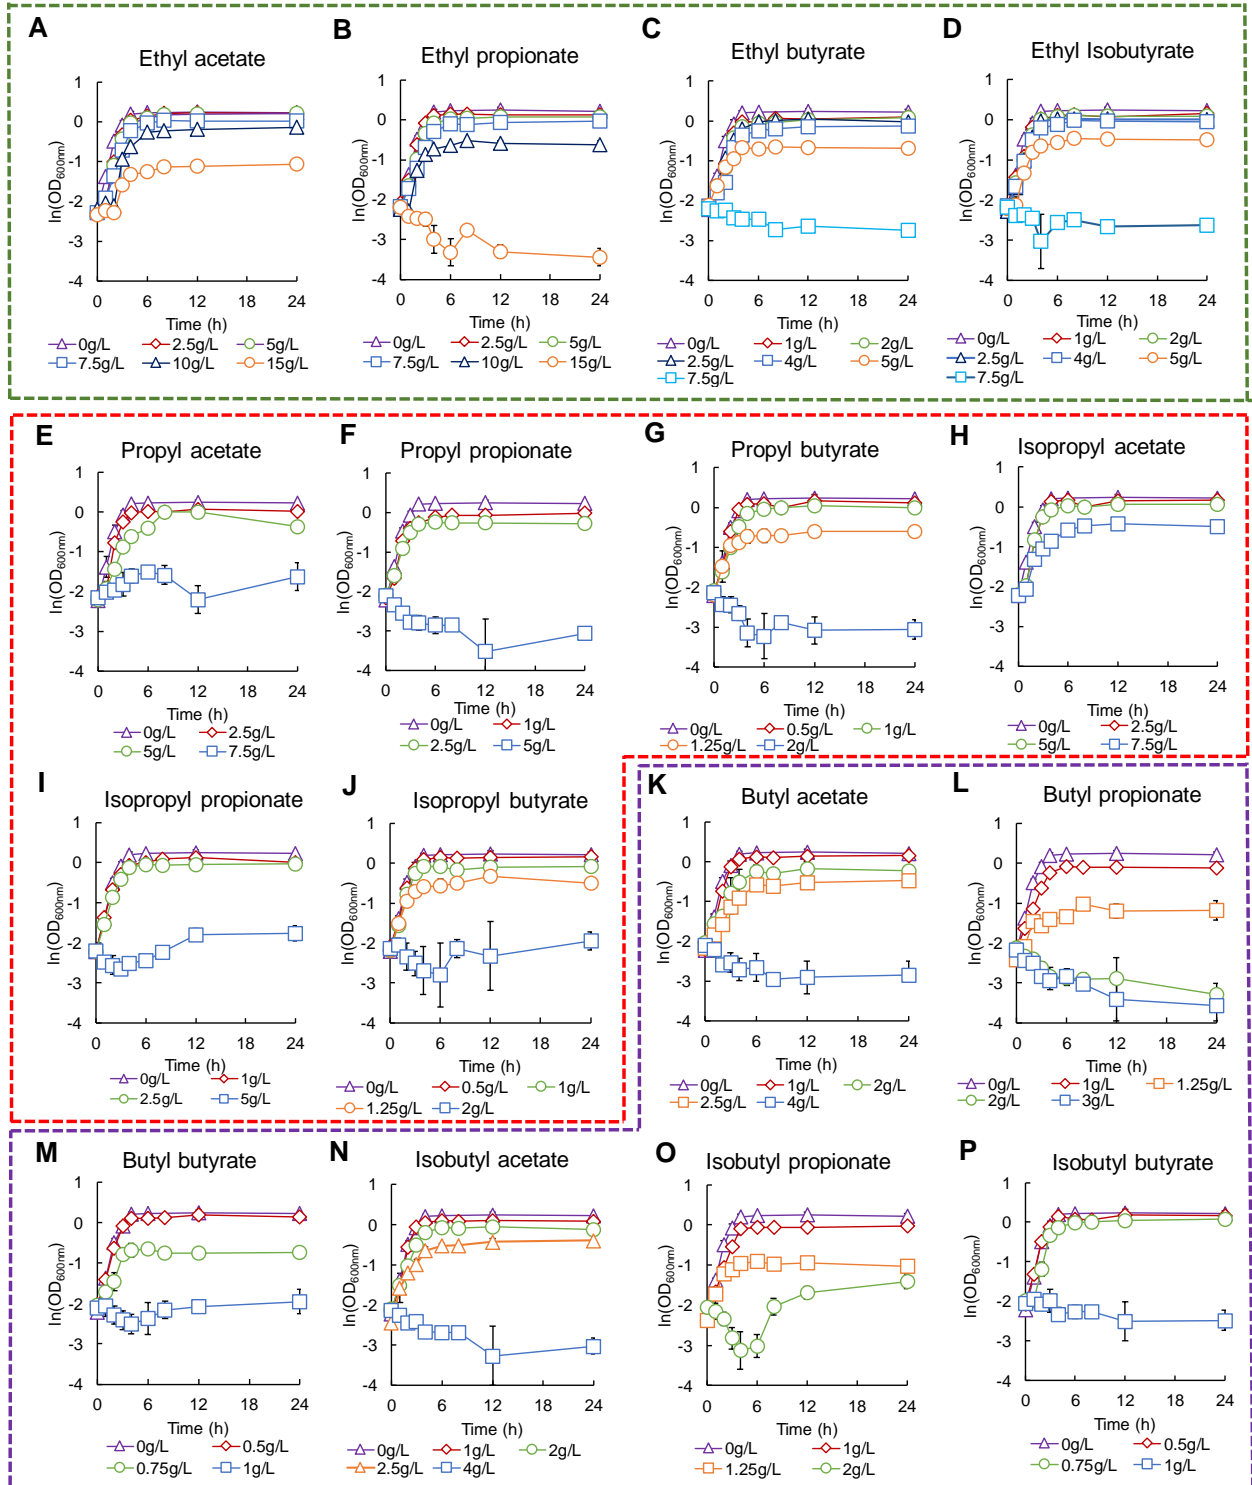

**Figure S4:** Correlation between growth rate and maximum OD of *E. coli* exposed to alcohols, acids, and esters at various concentrations

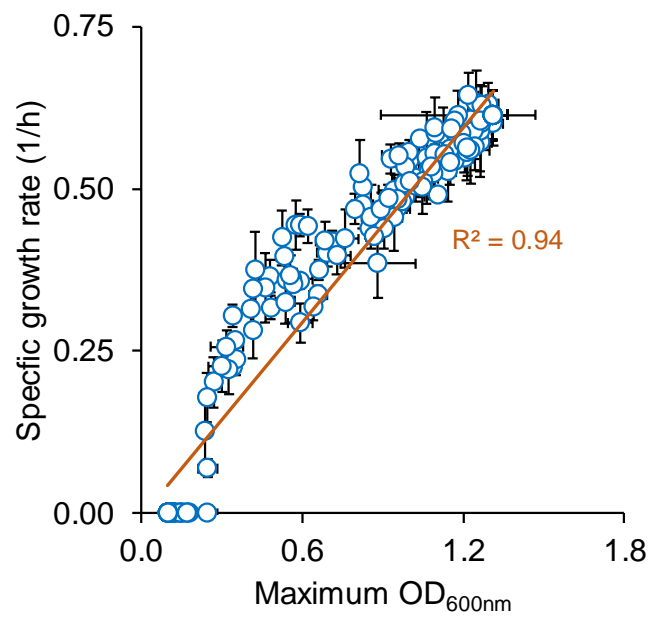

**Figure S5:** Effects of carbon numbers of alcohols on (A-C) specific growth rate and (D-F) maximum OD. Filled symbol: straight chain, open symbol: branched chain

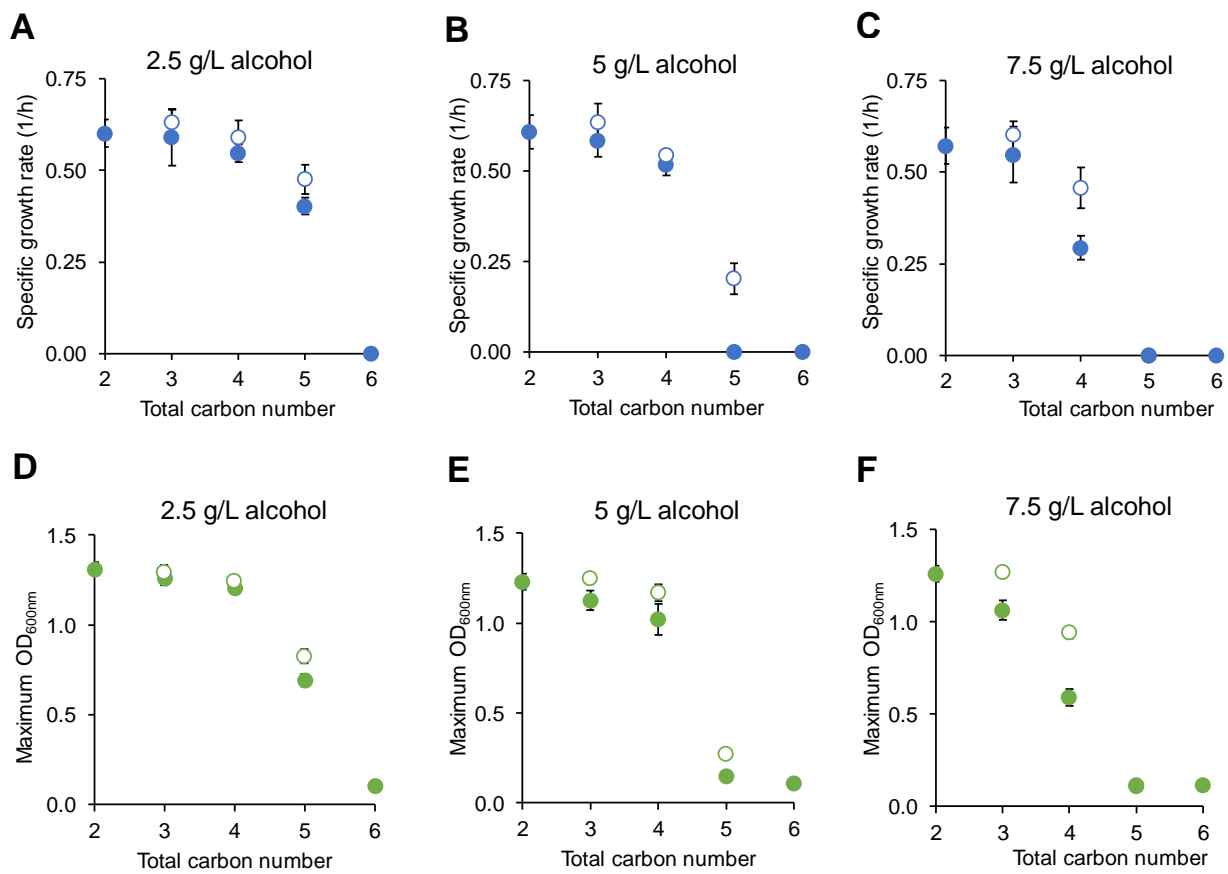

**Figure S6:** Effects of carbon numbers of acids on (A-C) specific growth rate and (D-F) maximum OD. Filled symbol: straight chain, open symbol: branched chain

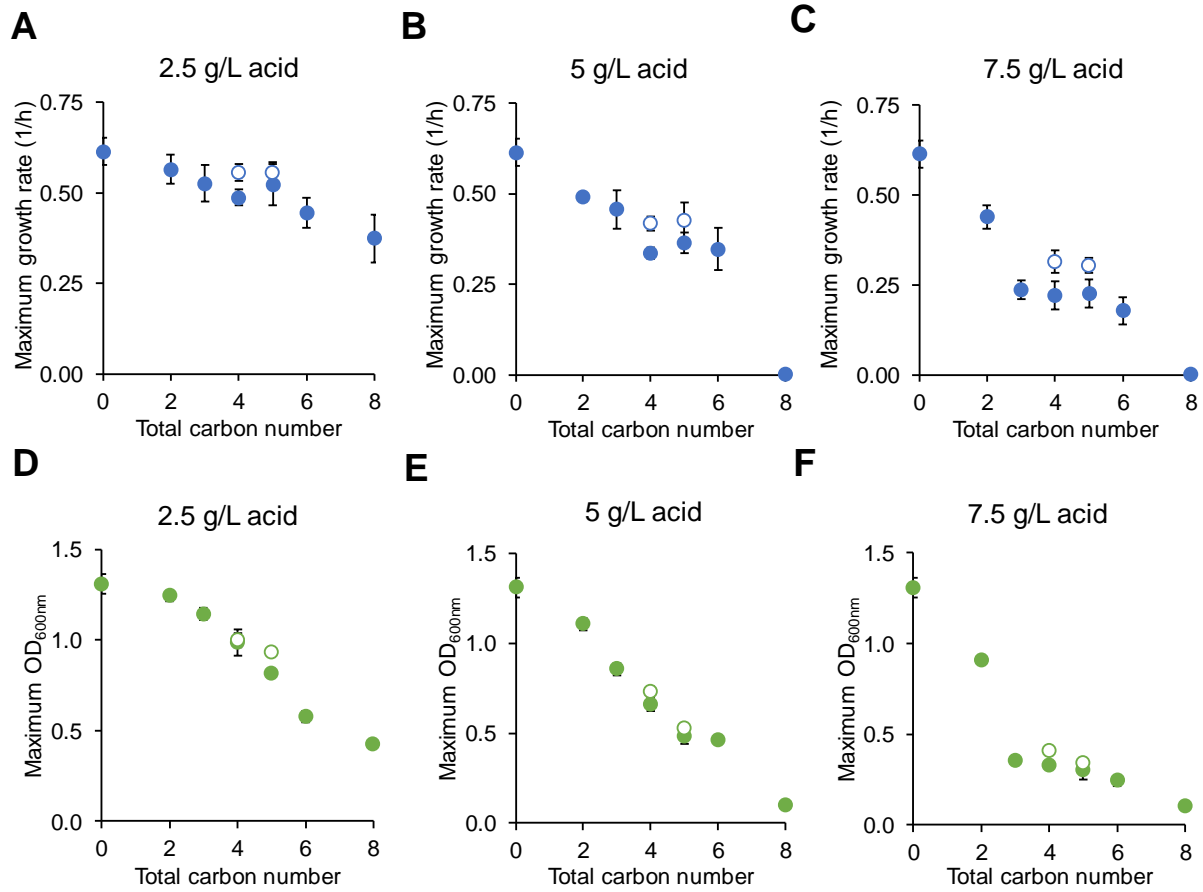

**Figure S7:** Effects of carbon numbers of alcohols on (A-C) specific growth rate and (D-F) maximum OD. Filled symbol: straight chain, open symbol: branched chain

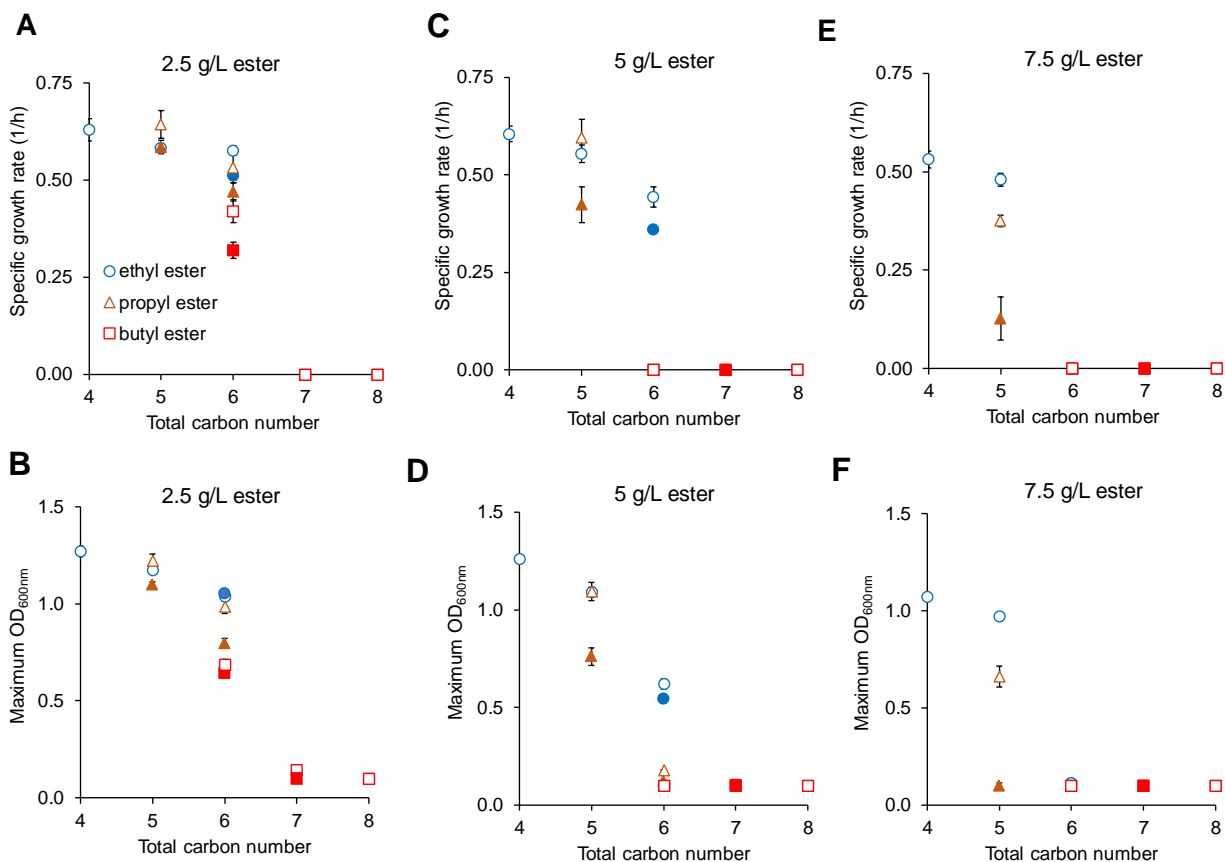

Supplement: 13068_2017_952_MOESM1_ESM.pdf [file 13068_2017_952_MOESM1_ESM.pdf]
